# Supplementary material for: Impact of CFTR modulation with Ivacaftor on Gut Microbiota and Intestinal Inflammation
Source: PubMed Central journal article supplement (PMC6292911; doi:10.1038/s41598-018-36364-6), 2018-12-13

## **Impact of CFTR modulation with Ivacaftor on Gut Microbiota and Intestinal Inflammation**

Chee Y. Ooi<sup>1,2,3 \*#</sup>, Saad A. Syed<sup>4,5,6#</sup>, Laura Rossi<sup>4,5,6</sup>, Millie Garg<sup>1</sup>, Bronwen Needham<sup>1</sup>, Julie Avolio<sup>7</sup>, Kelsey Young<sup>7</sup>, Michael G. Surette<sup>4,5,6</sup>, Tanja Gonska<sup>7,8</sup>

<sup>1</sup> School of Women's and Children's Health, Medicine, The University of New South Wales, Sydney, NSW, Australia

<sup>2</sup> Molecular and Integrative Cystic Fibrosis (miCF) Research Centre, Sydney Children's Hospital, Randwick, NSW, Australia

<sup>3</sup> Department of Gastroenterology, Sydney Children's Hospital, Randwick, NSW, Australia

<sup>4</sup> Department of Medicine, McMaster University, Hamilton, Ontario, Canada

<sup>5</sup> Department of Biochemistry & Biomedical Sciences, McMaster University, Hamilton, ON, Canada

<sup>6</sup> Farncombe Family Digestive Health Research Institute, McMaster University, Hamilton, ON, Canada

<sup>7</sup> Department of Paediatrics, Division of Gastroenterology, Hepatology and Nutrition, The Hospital for Sick Children, Toronto, Ontario, Canada

<sup>8</sup> Translational Medicine, Research Institute, The Hospital for Sick Children, Toronto, Ontario, Canada

\* Corresponding author

# Co-first authors

## **SUPPLEMENTAL FIGURE LEGENDS**

**Figure S1: Gut microbiome communities do not appear different with taxonomic summaries (A) by treatment (B) or sex (C), and do not differ in species richness (Observed Species) (D) or evenness (Shannon Diversity) (E) following treatment.**

**Figure S2: Gut microbiome weakly cluster by geographic location (Sydney, Australia vs. Toronto, Canada).**

**Figure S1**

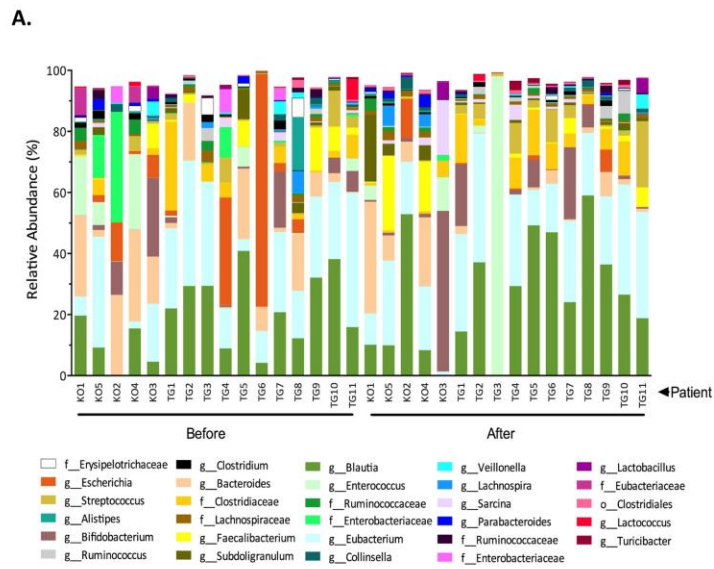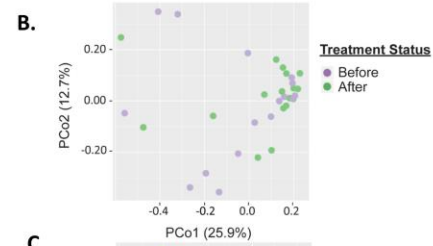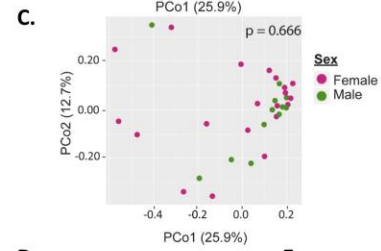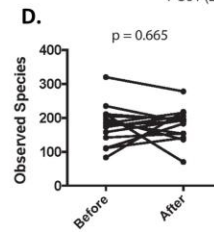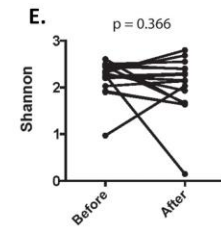

**Figure S2**

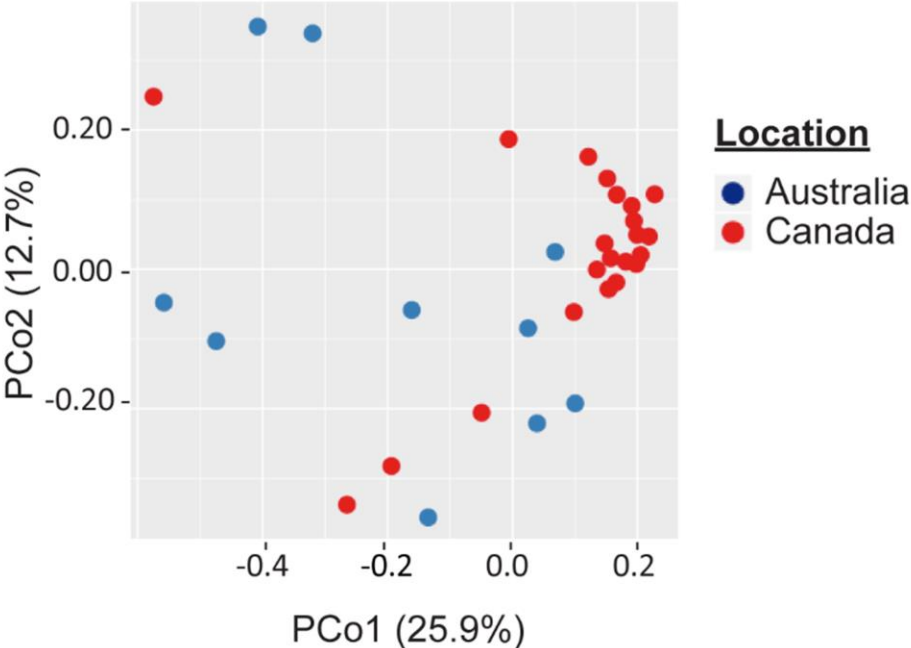

Supplement: 41598_2018_36364_MOESM1_ESM.pdf [file 41598_2018_36364_MOESM1_ESM.pdf]
